# Supplementary material
Source: Springer Nature journal article supplement (https://www.springermedizin.de/resource/supplementary/13054_2009_8406_MOESM8_ESM.pdf/9731896)

**A**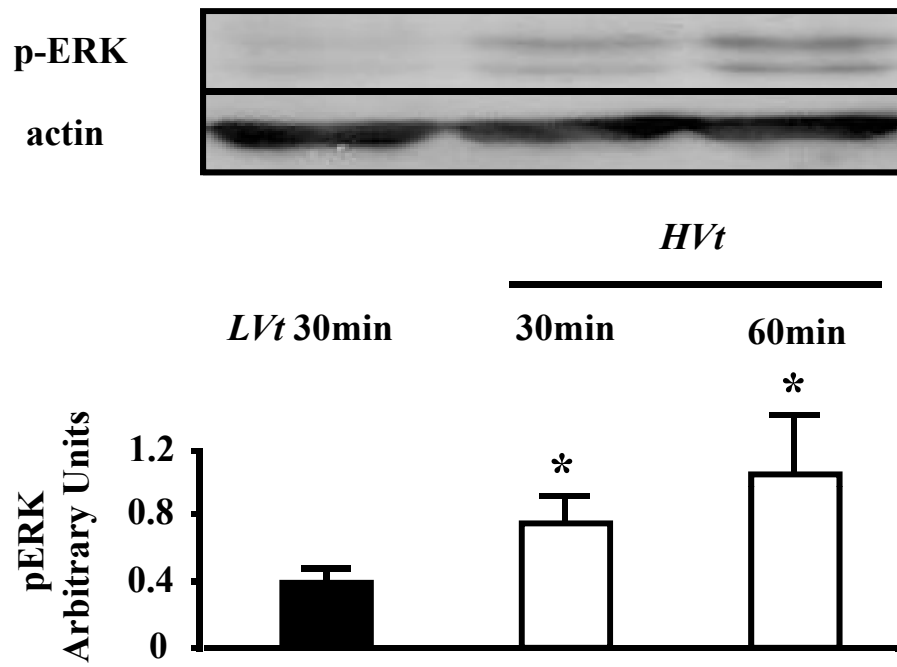**B**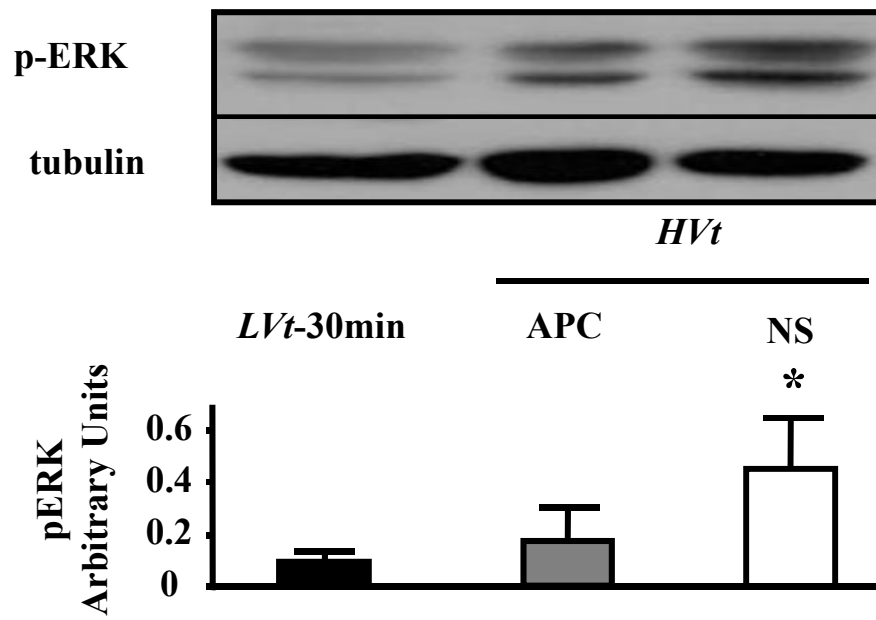**C**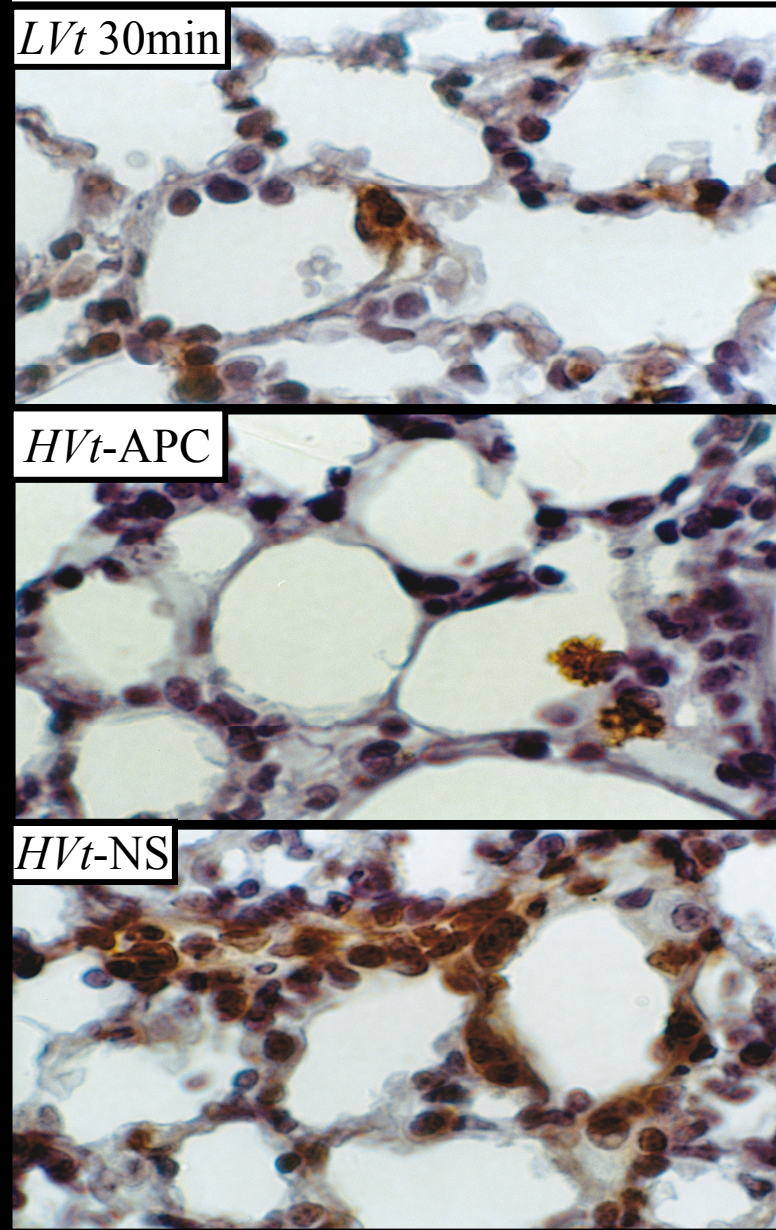

Supplement: MOESM8 [file 9731896]
